# Supplementary material for: The Imperative Use of Bacillus Consortium and Quercetin Contributes to Suppress Fusarium Wilt Disease by Direct Antagonism and Induced Resistance
Source: MDPI journal article supplement (doi:10.3390/microorganisms11102603), 2023-10-21
Supplement: s1 [file s1]

Table S1: Details of the collection sites of Rhizospheric soil.

| No. | Province | City/Town       | Coordinates            |
|-----|----------|-----------------|------------------------|
| 1   | Punjab   | Lahore          | 31.4790° N, 74.2662° E |
| 2   | Punjab   | Lahore          | 31.4220° N, 74.1739° E |
| 3   | Punjab   | Kasur           | 31.0249° N, 73.8479° E |
| 4   | Punjab   | Kasur           | 30.9906° N, 74.2708° E |
| 5   | Punjab   | Bahawalpur      | 29.4249° N, 71.7637° E |
| 6   | Punjab   | Raheem yar khan | 28.3688° N, 70.2422° E |

Table S2: Physiological parameters of the receptor.

| Parameter           | Value    |
|---------------------|----------|
| Estimated half-life | 30 hours |
| Theoretical pI      | 5.78     |
| Instability index   | 33.35    |
| Aliphatic index     | 87.62    |
| GRAVY               | -0.050   |
